# Supplementary material for: Metal Element Drivers of Rice Sensory Variation Revealed by ICP-MS and Electronic Tongue Predictive Modeling
Source: Research Square preprint supplement (doi:10.21203/rs.3.rs-8344203/v1), 2025-12-24
Supplement: Supplementary file 1 [file 21ed1de79357a4f9ffea5a9f.docx]

Table 1 Concentrations of macro-elements (Na, Mg, Al, K and Ca) in 36 rice samples (mg/kg)

| Rice  samples | Na | Mg | Al | K | Ca |
| --- | --- | --- | --- | --- | --- |
| 1 | 0.76 ± 0.02 | 20.42 ± 0.23 | 2.12 ± 0.08 | 118.50 ± 5.09 | 6.15 ± 0.11 |
| 2 | 1.16 ± 0.02 | 32.89 ± 1.619 | 3.51 ± 0.14 | 182.69 ± 8.77 | 10.97 ± 0.13 |
| 3 | 3.69 ± 0.09 | 24.91 ± 0.49 | 2.60 ± 0.14 | 127.24 ± 4.20 | 10.56 ± 0.46 |
| 4 | 1.52 ± 0.06 | 31.34 ± 0.44 | ND | 199.48 ± 5.98 | 6.94 ± 0.31 |
| 5 | ND | 20.68 ± 0.35 | ND | 148.23 ± 6.67 | 8.42 ± 0.35 |
| 6 | ND | 30.67 ± 0.95 | ND | 146.13 ± 4.82 | 7.06 ± 0.23 |
| 7 | 1.70 ± 0.03 | 69.39 ± 1.18 | ND | 235.58 ± 3.06 | 8.06 ± 0.20 |
| 8 | 7.14 ± 0.34 | 22.69 ± 0.36 | ND | 145.11 ± 4.78 | 5.48 ± 0.19 |
| 9 | 0.66 ± 0.01 | 16.99 ± 0.45 | 0.78 ± 0.04 | 105.60 ± 2.11 | 4.79 ± 0.11 |
| 10 | ND | 27.38 ± 0.95 | ND | 181.83 ± 6.72 | 5.74 ± 0.18 |
| 11 | 0.94 ± 0.02 | 33.98 ± 0.71 | ND | 129.35 ± 6.07 | 7.64 ± 0.12 |
| 12 | 1.38 ± 0.02 | 30.74 ± 0.92 | ND | 132.67 ± 2.38 | 7.08 ± 0.19 |
| 13 | ND | 26.95 ± 0.70 | ND | 203.67 ± 4.881 | 6.23 ± 0.23 |
| 14 | ND | 30.71 ± 1.29 | ND | 141.78 ± 4.39 | 7.80 ± 0.33 |
| 15 | ND | 27.66 ± 0.38 | ND | 204.44 ± 7.35 | 6.44 ± 0.16 |
| 16 | ND | 39.37 ± 1.57 | ND | 137.14 ± 3.56 | 6.94 ± 0.15 |
| 17 | ND | 26.11 ± 0.83 | ND | 159.47 ± 7.49 | 5.27 ± 0.10 |
| 18 | 0.77 ± 0.01 | 29.28 ± 0.52 | ND | 200.67 ± 3.4 | 6.36 ± 0.29 |
| 19 | ND | 36.78 ± 0.55 | ND | 172.47 ± 4.48 | 7.61 ± 0.13 |
| 20 | 3.42 ± 0.15 | 45.55 ± 1.59 | ND | 211.71 ± 7.83 | 6.82 ± 0.10 |
| 21 | ND | 36.15 ± 0.50 | ND | 179.26 ± 7.34 | 6.65 ± 0.22 |

Continued Table 1 Concentrations of macro-elements (Na, Mg, Al, K and Ca) in 36 rice samples (mg/kg)

| Rice  samples | Na | Mg | Al | K | Ca |
| --- | --- | --- | --- | --- | --- |
| 22 | 3.74 ± 0.18 | 55.99 ± 2.35 | ND | 206.94 ± 7.86 | 9.45 ± 0.23 |
| 23 | ND | 29.83 ± 1.01 | ND | 218.14 ± 6.10 | 6.29 ± 0.23 |
| 24 | 0.90± 0.02 | 43.73 ± 1.66 | ND | 150.34 ± 7.21 | 9.02 ± 0.36 |
| 25 | ND | 30.79 ± 1.07 | ND | 183.31 ± 6.04 | 7.03 ± 0.34 |
| 26 | ND | 19.85 ± 0.91 | ND | 145.07 ± 3.91 | 6.09 ± 0.18 |
| 27 | 1.03 ± 0.01 | 39.91 ± 0.47 | ND | 200.39 ± 8.41 | 7.25 ± 0.18 |
| 28 | 0.679 ± 0.02 | 33.13 ± 1.09 | ND | 158.87 ± 3.49 | 6.26 ± 0.25 |
| 29 | ND | 28.43 ± 1.10 | ND | 179.98 ± 4.67 | 6.36 ± 0.26 |
| 30 | 6.22 ± 0.24 | 53.60 ± 1.12 | ND | 286.55 ± 12.60 | 12.5 ± 0.60 |
| 31 | ND | 48.13 ± 1.39 | ND | 171.01 ± 6.66 | 6.21 ± 0.14 |
| 32 | 1.37 ± 0.02 | 78.34 ± 1.25 | ND | 255.34 ± 12.13 | 9.97 ± 0.28 |
| 33 | 1.46 ± 0.05 | 29.71 ± 0.80 | ND | 136.85 ± 3.96 | 8.49 ± 0.29 |
| 34 | 2.71 ± 0.09 | 39.71 ± 0.67 | ND | 213.67 ± 2.99 | 7.58 ± 0.37 |
| 35 | ND | 30.79 ± 1.32 | ND | 129.16 ± 6.07 | 7.33 ± 0.29 |
| 36 | ND | 30.51 ± 0.57 | ND | 185.28 ± 7.59 | 6.13 ± 0.34 |
