# Supplementary material for: Metal Element Drivers of Rice Sensory Variation Revealed by ICP-MS and Electronic Tongue Predictive Modeling
Source: Research Square preprint supplement (doi:10.21203/rs.3.rs-8344203/v1), 2025-12-24
Supplement: Supplementary file 2 [file 697ba8c43a02aac1308009bd.docx]

Table 2 Concentrations of essential trace elements (Group I: Mn, Fe, Co, Ni, Cu, Zn, Se and Mo) in 36 rice samples (mg/kg)

| Rice  samples | Mn | Fe | Co | Ni | Cu | Zn | Se | Mo |
| --- | --- | --- | --- | --- | --- | --- | --- | --- |
| 1 | 1.65 ± 0.08 | 2.49 ± 0.11 | 0.0055 ± 0.0003 | 0.121 ± 0.008 | 0.279 ± 0.019 | 3.55 ± 0.19 | 0.011 ± 0.001 | 0.069 ± 0.006 |
| 2 | 1.55 ± 0.05 | 3.04 ± 0.21 | 0.0018 ± 0.0002 | ND | 0.405 ± 0.021 | 3.10 ± 0.12 | ND | 0.082 ± 0.006 |
| 3 | 1.39 ± 0.05 | 3.07 ± 0.17 | 0.0061 ± 0.0004 | ND | 0.353 ± 0.015 | 3.00 ± 0.07 | ND | 0.089 ± 0.007 |
| 4 | 1.96 ± 0.08 | 1.73 ± 0.10 | 0.0011 ± 8.9E-05 | ND | 0.561 ± 0.039 | 2.83 ± 0.08 | ND | 0.126 ± 0.008 |
| 5 | 2.10 ± 0.07 | ND | 0.0023 ± 0.0001 | ND | 0.450 ± 0.029 | 2.93 ± 0.09 | ND | 0.067 ± 0.005 |
| 6 | 1.78 ± 0.09 | 0.76 ± 0.02 | 0.0006 ± 6.4E-05 | ND | 0.294 ± 0.012 | 2.57 ± 0.06 | ND | 0.065 ± 0.006 |
| 7 | 1.95 ± 0.06 | 0.95 ± 0.06 | 0.0010 ± 9.8E-05 | ND | 0.538 ± 0.035 | 3.14 ± 0.16 | ND | 0.081 ± 0.007 |
| 8 | 1.39 ± 0.06 | ND | 0.0007 ± 4.07E-05 | ND | 0.304 ± 0.018 | 2.34 ± 0.09 | ND | 0.067 ± 0.003 |
| 9 | 1.42 ± 0.06 | ND | 0.0021 ± 0.0002 | 0.104 ± 0.006 | 0.389 ± 0.022 | 2.75 ± 0.15 | ND | 0.078 ± 0.005 |
| 10 | 2.05 ± 0.05 | ND | 0.0012 ± 0.0001 | 0.100 ± 0.008 | 0.561 ± 0.030 | 2.96 ± 0.13 | ND | 0.096 ± 0.008 |
| 11 | 1.39 ± 0.07 | ND | ND | ND | 0.323 ± 0.011 | 2.02 ± 0.04 | 0.007 ± 0.0005 | 0.059 ± 0.003 |
| 12 | 2.15 ± 0.12 | ND | ND | ND | 0.394 ± 0.024 | 2.42 ± 0.13 | 0.009 ± 0.0007 | 0.055 ± 0.004 |
| 13 | 2.37 ± 0.08 | 1.50 ± 0.10 | 0.0022 ± 0.0002 | 0.108 ± 0.006 | 0.609 ± 0.022 | 2.97 ± 0.07 | 0.011 ± 0.0009 | 0.104 ± 0.008 |
| 14 | 1.71 ± 0.09 | 1.89 ± 0.11 | ND | ND | 0.294 ± 0.017 | 2.33 ± 0.10 | ND | 0.053 ± 0.002 |
| 15 | 1.83 ± 0.08 | 1.66 ± 0.05 | 0.0014 ± 0.0001 | ND | 0.532 ± 0.031 | 2.63 ± 0.08 | ND | 0.068 ± 0.002 |
| 16 | 1.81 ± 0.09 | 3.25 ± 0.20 | 0.0011 ± 0.0001 | ND | 0.235 ± 0.011 | 2.12 ± 0.10 | ND | 0.051 ± 0.003 |
| 17 | 1.97 ± 0.04 | 2.60 ± 0.08 | 0.0018 ± 0.0001 | ND | 0.507 ± 0.017 | 2.79 ± 0.06 | ND | 0.073 ± 0.003 |
| 18 | 1.86 ± 0.04 | 1.49 ± 0.09 | 0.0021 ± 0.0002 | ND | 0.542 ± 0.026 | 3.13 ± 0.16 | ND | 0.113 ± 0.008 |
| 19 | 1.90± 0.09 | 2.04 ± 0.08 | 0.0009 ± 5.2E-05 | ND | 0.402 ± 0.013 | 2.54 ± 0.13 | ND | 0.083 ± 0.008 |
| 20 | 1.21 ± 0.042 | 2.46 ± 0.15 | ND | ND | 0.411 ± 0.017 | 2.44 ± 0.07 | ND | 0.093 ± 0.007 |
| 21 | 1.97 ± 0.04 | ND | 0.0012 ± 0.0001 | ND | 0.479 ± 0.019 | 2.87 ± 0.07 | 0.010 ± 0.0007 | 0.096 ± 0.006 |

Continued Table 2 Concentrations of essential trace elements (Group I: Mn, Fe, Co, Ni, Cu, Zn, Se and Mo) in 36 rice samples (mg/kg)

| Rice  samples | Mn | Fe | Co | Ni | Cu | Zn | Se | Mo |
| --- | --- | --- | --- | --- | --- | --- | --- | --- |
| 22 | 1.34 ± 0.04 | 0.77 ± 0.04 | ND | ND | 0.355 ± 0.017 | 2.32 ± 0.11 | ND | 0.051 ± 0.003 |
| 23 | 1.93 ± 0.08 | 0.70 ± 0.03 | 0.0014 ± 0.0001 | ND | 0.528 ± 0.017 | 2.57 ± 0.11 | 0.036 ± 0.003 | 0.076 ± 0.005 |
| 24 | 1.33 ± 0.07 | ND | 0.0008 ± 6.9E-05 | ND | 0.313 ± 0.014 | 2.70 ± 0.08 | ND | 0.048 ± 0.002 |
| 25 | 1.95 ± 0.06 | 0.60 ± 0.03 | 0.0017 ± 0.0001 | ND | 0.520 ± 0.029 | 2.95 ± 0.12 | ND | 0.094 ± 0.006 |
| 26 | 1.89 ± 0.06 | ND | 0.0024 ± 0.0002 | ND | 0.476 ± 0.027 | 2.85 ± 0.15 | ND | 0.097 ± 0.008 |
| 27 | 2.38 ± 0.06 | 0.86 ± 0.03 | 0.0007 ± 5.4E-05 | ND | 0.619 ± 0.018 | 2.79 ± 0.11 | ND | 0.104 ± 0.007 |
| 28 | 2.14 ± 0.08 | 1.08 ± 0.07 | 0.0027 ± 0.0002 | ND | 0.548 ± 0.029 | 2.96 ± 0.071 | ND | 0.091 ± 0.004 |
| 29 | 1.99 ± 0.08 | 1.16 ± 0.06 | 0.0042± 0.0003 | ND | 0.484 ± 0.019 | 3.18 ± 0.17 | 0.006 ± 0.0005 | 0.100 ± 0.008 |
| 30 | 1.49 ± 0.06 | 2.01 ± 0.14 | ND | ND | 0.268 ± 0.012 | 2.52 ± 0.06 | 0.019 ± 0.001 | 0.035± 0.002 |
| 31 | 1.63 ± 0.09 | 1.80 ± 0.07 | 0.0008 ± 4.6E-05 | ND | 0.326 ± 0.011 | 2.78 ± 0.11 | ND | 0.107 ± 0.011 |
| 32 | 2.08 ± 0.04 | 1.41 ± 0.05 | ND | ND | 0.325 ± 0.009 | 2.51 ± 0.13 | ND | 0.040 ± 0.002 |
| 33 | 1.86 ± 0.04 | 0.68 ± 0.02 | ND | ND | 0.333 ± 0.020 | 1.97 ± 0.10 | 0.011 ± 0.0008 | 0.051 ± 0.004 |
| 34 | 1.96 ± 0.04 | 10.32 ± 0.44 | 0.0010 ± 0.0001 | ND | 0.556 ± 0.022 | 2.90 ± 0.08 | ND | 0.094 ± 0.006 |
| 35 | 1.99 ± 0.09 | 5.52 ± 0.25 | 0.0008 ± 7.2E-05 | ND | 0.301 ± 0.011 | 2.80 ± 0.11 | ND | 0.074 ± 0.005 |
| 36 | 2.23 ± 0.08 | 3.78 ± 0.21 | 0.0020 ± 0.0001 | ND | 0.591 ± 0.028 | 3.03 ± 0.12 | 0.020 ± 0.001 | 0.112 ± 0.005 |
