# Supplementary material for: Metal Element Drivers of Rice Sensory Variation Revealed by ICP-MS and Electronic Tongue Predictive Modeling
Source: Research Square preprint supplement (doi:10.21203/rs.3.rs-8344203/v1), 2025-12-24
Supplement: Supplementary file 3 [file 9a350370fe988ad0bf3ef18e.docx]

Table 4 Concentrations of toxic and non-essential elements (As, Ag, Cd, Sb, Ba, Tl and Pb) in 36 rice samples (mg/kg)

| Rice  samples | As | Ag | Cd | Sb | Ba | Tl | Pb |
| --- | --- | --- | --- | --- | --- | --- | --- |
| 1 | 0.025 ± 0.002 | 9.51± 1.07 | 0.738 ± 0.1011 | ND | 0.050 ± 0.0033 | ND | ND |
| 2 | 0.021 ± 0.002 | ND | 0.001 ± 0.0001 | ND | 0.054 ± 0.0018 | ND | ND |
| 3 | 0.026 ± 0.002 | 8.25 ± 0.62 | 0.004 ± 0.0004 | ND | 0.064 ± 0.0044 | ND | ND |
| 4 | 0.025 ± 0.002 | ND | 0.006 ± 0.0005 | ND | ND | ND | ND |
| 5 | 0.016 ± 0.001 | 8.74 ± 0.94 | 0.008 ± 0.0010 | ND | 0.022 ± 0.0012 | ND | ND |
| 6 | 0.027 ± 0.0038 | ND | ND | ND | ND | ND | ND |
| 7 | 0.018 ± 0.001 | 18.19 ± 1.50 | 0.004 ± 0.0005 | ND | ND | ND | ND |
| 8 | 0.030 ± 0.003 | ND | 0.002 ± 0.0001 | ND | ND | ND | ND |
| 9 | 0.021± 0.001 | ND | 0.455 ± 0.0621 | ND | 0.045 ± 0.0028 | ND | ND |
| 10 | 0.023 ± 0.002 | ND | 0.0241 ± 0.0017 | ND | 0.0416 ± 0.0028 | ND | ND |
| 11 | 0.022 ± 0.002 | 8.40 ± 0.83 | ND | ND | ND | ND | ND |
| 12 | 0.026 ± 0.003 | ND | 0.003 ± 0.0003 | ND | ND | ND | ND |
| 13 | 0.027 ± 0.002 | ND | 0.019 ± 0.0020 | ND | 0.061 ± 0.0026 | ND | ND |
| 14 | 0.024 ± 0.002 | ND | 0.001 ± 0.0001 | ND | ND | ND | ND |
| 15 | 0.037 ± 0.003 | ND | 0.014 ± 0.0014 | ND | 0.033 ± 0.0012 | ND | ND |
| 16 | 0.0294 ± 0.003 | ND | ND | ND | ND | ND | ND |
| 17 | 0.021 ± 0.001 | ND | 0.006 ± 0.0006 | ND | 0.037 ± 0.0019 | ND | ND |
| 18 | 0.028 ± 0.002 | 9.79 ± 1.17 | 0.021 ± 0.0022 | ND | 0.033 ± 0.0016 | ND | 0.39 ± 0.036 |
| 19 | 0.029 ± 0.002 | ND | 0.006 ± 0.0008 | ND | 0.034 ± 0.0014 | ND | ND |
| 20 | 0.029 ± 0.002 | ND | ND | ND | ND | ND | ND |
| 21 | 0.038 ± 0.003 | ND | 0.009 ± 0.0007 | ND | 0.035 ± 0.0014 | ND | ND |

Continued Table 4 Concentrations of toxic and non-essential elements (As, Ag, Cd, Sb, Ba, Tl and Pb) in 36 rice samples (mg/kg)

| Rice  samples | As | Ag | Cd | Sb | Ba | Tl | Pb |
| --- | --- | --- | --- | --- | --- | --- | --- |
| 22 | 0.026 ± 0.002 | 8.91 ± 0.81 | ND | ND | ND | ND | ND |
| 23 | 0.036 ± 0.003 | ND | 0.015 ± 0.0020 | ND | 0.047 ± 0.0035 | ND | ND |
| 24 | 0.029 ± 0.003 | ND | ND | ND | ND | ND | ND |
| 25 | 0.028 ± 0.002 | ND | 0.021 ± 0.0027 | ND | 0.026 ± 0.0013 | ND | ND |
| 26 | 0.019 ± 0.002 | ND | 0.017 ± 0.0021 | ND | 0.035 ± 0.0021 | ND | ND |
| 27 | 0.026 ± 0.003 | ND | 0.007 ± 0.0008 | ND | ND | ND | ND |
| 28 | 0.021 ± 0.002 | ND | 0.012 ± 0.0009 | ND | 0.037 ± 0.0029 | ND | ND |
| 29 | 0.026 ± 0.002 | ND | 0.008 ± 0.0009 | ND | 0.055 ± 0.0022 | ND | ND |
| 30 | 0.021 ± 0.002 | ND | ND | ND | 0.0136 ± 0.0009 | ND | ND |
| 31 | 0.027 ± 0.002 | ND | ND | ND | ND | ND | ND |
| 32 | 0.023 ± 0.002 | ND | ND | ND | ND | ND | ND |
| 33 | 0.02 ± 0.002 | 8.67± 1.02 | ND | ND | 0.010 ± 0.0004 | ND | ND |
| 34 | 0.019 ± 0.001 | ND | 0.0038 ± 0.0002 | ND | ND | ND | ND |
| 35 | 0.028 ± 0.002 | ND | 0.001 ± 0.0001 | ND | ND | ND | ND |
| 36 | 0.028 ± 0.002 | ND | 0.024 ± 0.0028 | ND | 0.058 ± 0.0045 | ND | ND |
