# Supplementary material for: Metal Element Drivers of Rice Sensory Variation Revealed by ICP-MS and Electronic Tongue Predictive Modeling
Source: Research Square preprint supplement (doi:10.21203/rs.3.rs-8344203/v1), 2025-12-24
Supplement: Supplementary file 4 [file bd7f29549ca9a1e9d9c03fa9.docx]

Table 5 Sensory assessment of rice samples: odor, appearance, palatability, taste, cooled rice texture, and eating quality

| Group | Rice samples | Odor | Appearance | Palatability | Taste | Cooled rice texture | Eating Quality |
| --- | --- | --- | --- | --- | --- | --- | --- |
| I | 2 | 14.2 ± 1.2a | 12.8 ± 1.1a | 18.8 ± 1.8a | 15.7 ± 1.5a | 2.7 ± 0.5a | 64.1 ± 2.7a |
| 3 | 15.6 ± 1.4b | 16.5 ± 1.4b | 17.3 ± 1.5a | 15.1 ± 1.4a | 2.8 ± 0.4a | 67.2 ± 2.7b |
| II | 6 | 16.8 ± 1.2c | 15.1 ± 1.2c | 25.8 ± 2.3b | 22.2 ± 1.4b | 3.2 ± 0.6b | 83.1 ± 3.5c |
| 8 | 16.7 ± 0.9c | 15.9 ± 1.5b | 22.9 ± 2.4c | 21.3 ± 1.6b | 3.1 ±0.6b | 80.1 ± 3.1d |
| 14 | 16.6 ± 1.0c | 15.8 ± 1.3b | 24.9 ± 2.6b | 20.8 ± 2.1c | 3.0 ± 0.5a | 81.1 ± 4.5c |
| 20 | 16.1 ± 1.2b | 16.8 ± 1.3b | 23.6 ± 2.3c | 21.9 ± 1.8b | 3.1 ± 0.5a | 81.6 ± 3.4c |
| III | 23 | 16.6 ± 1.2b | 13.7 ± 1.2a | 20.6 ± 1.7d | 19.5 ± 1.6c | 3.2 ±0.5b | 73.6 ± 3.7e |
| 28 | 15.8 ± 1.5b | 16.1 ± 1.2b | 20.5 ± 1.4d | 19.6 ± 1.8c | 3.1 ±0.5b | 75.1 ± 3.3e |
| 29 | 16.1 ± 1.3b | 16.6 ± 1.4b | 21.2 ± 3.0d | 19.8 ± 1.6c | 2.9 ±0.5a | 76.7 ± 2.9f |
| 36 | 17.1 ± 1.6c | 14.4 ± 1.1c | 20.7 ± 1.2d | 18.5 ± 1.9d | 3.0 ±0.5a | 73.8 ± 2.7e |
