# Supplementary material for: Metal Element Drivers of Rice Sensory Variation Revealed by ICP-MS and Electronic Tongue Predictive Modeling
Source: Research Square preprint supplement (doi:10.21203/rs.3.rs-8344203/v1), 2025-12-24
Supplement: Supplementary file 5 [file bf9ca7aefe3c915be29856c0.docx]

Table 3 Concentrations of essential trace elements (Group II: Be, B, Ti, V, Cr and Sr) in 36 rice samples (mg/kg)

| Rice  samples | Be | B | Ti | V | Cr | Sr |
| --- | --- | --- | --- | --- | --- | --- |
| 1 | ND | ND | 0.026 ± 0.002 | ND | ND | ND |
| 2 | ND | 0.522 ± 0.031 | 0.031 ± 0.002 | 0.003 ± 0.0002 | ND | 0.259 ± 0.012 |
| 3 | ND | 0.442 ± 0.025 | 0.0306 ± 0.002 | 0.002 ± 0.0001 | ND | 0.217 ± 0.011 |
| 4 | ND | ND | 0.014 ± 0.001 | ND | ND | ND |
| 5 | ND | ND | 0.091 ± 0.006 | ND | ND | ND |
| 6 | ND | ND | 0.111 ± 0.007 | ND | ND | ND |
| 7 | ND | ND | 0.083 ± 0.005 | ND | ND | ND |
| 8 | ND | ND | 0.042 ± 0.002 | ND | ND | ND |
| 9 | ND | ND | 0.079 ± 0.006 | ND | ND | ND |
| 10 | ND | ND | 0.061 ± 0.005 | ND | ND | ND |
| 11 | ND | ND | 0.0424 ± 0.003 | ND | ND | ND |
| 12 | ND | ND | 0.037 ± 0.002 | ND | ND | ND |
| 13 | ND | ND | 0.021 ± 0.001 | ND | ND | ND |
| 14 | ND | ND | 0.019 ± 0.001 | ND | ND | ND |
| 15 | ND | ND | 0.020 ± 0.001 | ND | ND | ND |
| 16 | ND | ND | 0.029 ± 0.002 | ND | 0.154 ± 0.012 | ND |
| 17 | ND | ND | 0.024 ± 0.0029 | ND | ND | ND |
| 18 | ND | ND | 0.0288 ± 0.002 | ND | ND | ND |
| 19 | ND | ND | 0.025 ± 0.0025 | ND | ND | ND |
| 20 | ND | ND | 0.027 ± 0.002 | ND | ND | ND |
| 21 | ND | ND | 0.023 ± 0.001 | ND | ND | ND |

Continued Table 3 Concentrations of essential trace elements (Group II: Be, B, Ti, V, Cr and Sr) in 36 rice samples (mg/kg)

| Rice  samples | Be | B | Ti | V | Cr | Sr |
| --- | --- | --- | --- | --- | --- | --- |
| 22 | ND | ND | 0.045 ± 0.004 | ND | ND | ND |
| 23 | ND | ND | 0.2556 ± 0.016 | ND | ND | ND |
| 24 | ND | ND | 0.027 ± 0.002 | ND | ND | ND |
| 25 | ND | ND | 0.071 ± 0.005 | ND | ND | ND |
| 26 | ND | ND | 0.019 ± 0.001 | ND | ND | ND |
| 27 | ND | ND | 0.152 ± 0.011 | ND | ND | ND |
| 28 | ND | ND | 0.030 ± 0.003 | ND | ND | ND |
| 29 | ND | ND | 0.021 ± 0.001 | ND | ND | ND |
| 30 | ND | 0.249 ± 0.017 | 0.029 ± 0.002 | ND | ND | ND |
| 31 | ND | ND | 0.030 ± 0.002 | ND | ND | ND |
| 32 | ND | ND | 0.047 ± 0.003 | ND | ND | ND |
| 33 | ND | ND | 0.026 ± 0.002 | ND | ND | ND |
| 34 | ND | ND | 0.039 ± 0.003 | ND | ND | ND |
| 35 | ND | ND | 0.022 ± 0.002 | ND | ND | ND |
| 36 | ND | ND | 0.019 ± 0.001 | ND | ND | ND |
